# Supplementary material for: LncRNA LINC00963 promotes colorectal cancer cell proliferation and metastasis by regulating miR-1281 and TRIM65
Source: Mol Med Rep. 2021 Sep 7;24(5):781. doi: 10.3892/mmr.2021.12421 (PMC8436205; doi:10.3892/mmr.2021.12421)
Supplement: Supporting Data [file Supplementary_Data.xlsx]

## Sheet: Supplementary Table the potenti
Table SI. Potential target miRNAs of LINC00963 predicted by LncBase database.
Transcript ID	Gene_ID (gene name)	miRNA name (miRBase version)	Score
>ENST00000608272	ENSG00000204054(LINC00963)	hsa-miR-4659b-3p	0.999
>ENST00000608272	ENSG00000204054(LINC00963)	hsa-miR-4778-3p	0.999
>ENST00000608272	ENSG00000204054(LINC00963)	hsa-miR-4314	0.998
>ENST00000608369	ENSG00000204054(LINC00963)	hsa-miR-4722-5p	0.997
>ENST00000608272	ENSG00000204054(LINC00963)	hsa-miR-6783-3p	0.997
>ENST00000608669	ENSG00000204054(LINC00963)	hsa-miR-1273h-5p	0.997
>ENST00000608272	ENSG00000204054(LINC00963)	hsa-miR-4646-5p	0.996
>ENST00000608272	ENSG00000204054(LINC00963)	hsa-miR-7111-3p	0.996
>ENST00000608272	ENSG00000204054(LINC00963)	hsa-miR-3921	0.996
>ENST00000607931	ENSG00000204054(LINC00963)	hsa-miR-5688	0.994
>ENST00000608272	ENSG00000204054(LINC00963)	hsa-miR-204-3p	0.994
>ENST00000624884	ENSG00000204054(LINC00963)	hsa-miR-5582-5p	0.993
>ENST00000419300	ENSG00000204054(LINC00963)	hsa-miR-4755-3p	0.993
>ENST00000607931	ENSG00000204054(LINC00963)	hsa-miR-495-3p	0.992
>ENST00000419300	ENSG00000204054(LINC00963)	hsa-miR-4524a-3p	0.992
>ENST00000608272	ENSG00000204054(LINC00963)	hsa-miR-6742-3p	0.991
>ENST00000419300	ENSG00000204054(LINC00963)	hsa-miR-214-5p	0.991
>ENST00000454968	ENSG00000204054(LINC00963)	hsa-miR-4682	0.99
>ENST00000419300	ENSG00000204054(LINC00963)	hsa-miR-1273g-3p	0.988
>ENST00000419300	ENSG00000204054(LINC00963)	hsa-miR-182-5p	0.987
>ENST00000624884	ENSG00000204054(LINC00963)	hsa-miR-509-5p	0.986
>ENST00000624884	ENSG00000204054(LINC00963)	hsa-miR-509-3-5p	0.986
>ENST00000608272	ENSG00000204054(LINC00963)	hsa-miR-6845-3p	0.986
>ENST00000608272	ENSG00000204054(LINC00963)	hsa-miR-3613-3p	0.986
>ENST00000419300	ENSG00000204054(LINC00963)	hsa-miR-1913	0.986
>ENST00000624884	ENSG00000204054(LINC00963)	hsa-miR-892c-5p	0.985
>ENST00000419300	ENSG00000204054(LINC00963)	hsa-miR-6884-5p	0.984
>ENST00000624009	ENSG00000204054(LINC00963)	hsa-miR-6787-3p	0.981
>ENST00000419300	ENSG00000204054(LINC00963)	hsa-miR-346	0.98
>ENST00000624884	ENSG00000204054(LINC00963)	hsa-miR-7106-5p	0.979
>ENST00000419300	ENSG00000204054(LINC00963)	hsa-miR-451b	0.979
>ENST00000419300	ENSG00000204054(LINC00963)	hsa-miR-3151-5p	0.975
>ENST00000419300	ENSG00000204054(LINC00963)	hsa-miR-1343-5p	0.973
>ENST00000419300	ENSG00000204054(LINC00963)	hsa-miR-488-3p	0.972
>ENST00000419300	ENSG00000204054(LINC00963)	hsa-miR-4288	0.972
>ENST00000608272	ENSG00000204054(LINC00963)	hsa-miR-4279	0.972
>ENST00000419300	ENSG00000204054(LINC00963)	hsa-miR-6514-3p	0.969
>ENST00000419300	ENSG00000204054(LINC00963)	hsa-miR-5006-5p	0.969
>ENST00000453213	ENSG00000204054(LINC00963)	hsa-miR-1178-3p	0.969
>ENST00000608272	ENSG00000204054(LINC00963)	hsa-miR-548c-3p	0.968
>ENST00000624884	ENSG00000204054(LINC00963)	hsa-miR-765	0.968
>ENST00000608272	ENSG00000204054(LINC00963)	hsa-miR-3192-5p	0.967
>ENST00000624884	ENSG00000204054(LINC00963)	hsa-miR-646	0.966
>ENST00000624884	ENSG00000204054(LINC00963)	hsa-miR-4771	0.965
>ENST00000419300	ENSG00000204054(LINC00963)	hsa-miR-940	0.965
>ENST00000608272	ENSG00000204054(LINC00963)	hsa-miR-6875-3p	0.965
>ENST00000419300	ENSG00000204054(LINC00963)	hsa-miR-1910-3p	0.962
>ENST00000419300	ENSG00000204054(LINC00963)	hsa-miR-7977	0.961
>ENST00000624884	ENSG00000204054(LINC00963)	hsa-miR-548x-5p	0.96
>ENST00000624884	ENSG00000204054(LINC00963)	hsa-miR-548g-5p	0.96
>ENST00000624884	ENSG00000204054(LINC00963)	hsa-miR-548aj-5p	0.96
>ENST00000412141	ENSG00000204054(LINC00963)	hsa-miR-6766-5p	0.959
>ENST00000419300	ENSG00000204054(LINC00963)	hsa-miR-612	0.959
>ENST00000419300	ENSG00000204054(LINC00963)	hsa-miR-4768-3p	0.959
>ENST00000624884	ENSG00000204054(LINC00963)	hsa-miR-548f-5p	0.957
>ENST00000419300	ENSG00000204054(LINC00963)	hsa-miR-3714	0.957
>ENST00000419300	ENSG00000204054(LINC00963)	hsa-miR-4731-5p	0.956
>ENST00000419300	ENSG00000204054(LINC00963)	hsa-miR-324-3p	0.955
>ENST00000608272	ENSG00000204054(LINC00963)	hsa-miR-4653-5p	0.953
>ENST00000608272	ENSG00000204054(LINC00963)	hsa-miR-1343-3p	0.952
>ENST00000419300	ENSG00000204054(LINC00963)	hsa-miR-485-5p	0.951
>ENST00000419300	ENSG00000204054(LINC00963)	hsa-miR-6840-3p	0.945
>ENST00000454635	ENSG00000204054(LINC00963)	hsa-miR-1304-5p	0.943
>ENST00000419300	ENSG00000204054(LINC00963)	hsa-miR-6878-3p	0.942
>ENST00000419300	ENSG00000204054(LINC00963)	hsa-miR-3672	0.942
>ENST00000624884	ENSG00000204054(LINC00963)	hsa-miR-10b-3p	0.942
>ENST00000419300	ENSG00000204054(LINC00963)	hsa-miR-939-5p	0.94
>ENST00000419300	ENSG00000204054(LINC00963)	hsa-miR-4426	0.939
>ENST00000419300	ENSG00000204054(LINC00963)	hsa-miR-548f-3p	0.937
>ENST00000419300	ENSG00000204054(LINC00963)	hsa-miR-6872-3p	0.937
>ENST00000624884	ENSG00000204054(LINC00963)	hsa-miR-1273h-3p	0.937
>ENST00000608272	ENSG00000204054(LINC00963)	hsa-miR-6881-3p	0.936
>ENST00000624884	ENSG00000204054(LINC00963)	hsa-miR-4311	0.935
>ENST00000419300	ENSG00000204054(LINC00963)	hsa-miR-5580-3p	0.935
>ENST00000419300	ENSG00000204054(LINC00963)	hsa-miR-548e-3p	0.932
>ENST00000419300	ENSG00000204054(LINC00963)	hsa-miR-7-1-3p	0.932
>ENST00000622120	ENSG00000204054(LINC00963)	hsa-miR-6842-3p	0.932
>ENST00000423918	ENSG00000204054(LINC00963)	hsa-miR-1303	0.932
>ENST00000607931	ENSG00000204054(LINC00963)	hsa-miR-3115	0.931
>ENST00000419300	ENSG00000204054(LINC00963)	hsa-miR-7-2-3p	0.928
>ENST00000419300	ENSG00000204054(LINC00963)	hsa-miR-4478	0.927
>ENST00000419300	ENSG00000204054(LINC00963)	hsa-miR-6818-3p	0.927
>ENST00000419300	ENSG00000204054(LINC00963)	hsa-miR-6808-5p	0.927
>ENST00000419300	ENSG00000204054(LINC00963)	hsa-miR-6511a-5p	0.927
>ENST00000419300	ENSG00000204054(LINC00963)	hsa-miR-502-5p	0.926
>ENST00000454635	ENSG00000204054(LINC00963)	hsa-miR-6804-5p	0.925
>ENST00000419300	ENSG00000204054(LINC00963)	hsa-miR-548ar-3p	0.923
>ENST00000419300	ENSG00000204054(LINC00963)	hsa-miR-4662b	0.923
>ENST00000419300	ENSG00000204054(LINC00963)	hsa-miR-3189-5p	0.923
>ENST00000419300	ENSG00000204054(LINC00963)	hsa-miR-548a-3p	0.921
>ENST00000419300	ENSG00000204054(LINC00963)	hsa-miR-4647	0.921
>ENST00000622680	ENSG00000204054(LINC00963)	hsa-miR-3135b	0.921
>ENST00000419300	ENSG00000204054(LINC00963)	hsa-miR-6088	0.92
>ENST00000624884	ENSG00000204054(LINC00963)	hsa-miR-6507-3p	0.919
>ENST00000419300	ENSG00000204054(LINC00963)	hsa-miR-4524b-3p	0.919
>ENST00000624884	ENSG00000204054(LINC00963)	hsa-miR-6737-5p	0.919
>ENST00000419300	ENSG00000204054(LINC00963)	hsa-miR-1285-3p	0.919
>ENST00000419300	ENSG00000204054(LINC00963)	hsa-miR-5787	0.918
>ENST00000624884	ENSG00000204054(LINC00963)	hsa-miR-548u	0.917
>ENST00000419300	ENSG00000204054(LINC00963)	hsa-miR-5589-5p	0.916
>ENST00000419300	ENSG00000204054(LINC00963)	hsa-miR-4419b	0.916
>ENST00000419300	ENSG00000204054(LINC00963)	hsa-miR-4677-5p	0.914
>ENST00000419300	ENSG00000204054(LINC00963)	hsa-miR-934	0.914
>ENST00000624884	ENSG00000204054(LINC00963)	hsa-miR-6819-5p	0.914
>ENST00000419300	ENSG00000204054(LINC00963)	hsa-miR-3929	0.914
>ENST00000419300	ENSG00000204054(LINC00963)	hsa-miR-6764-5p	0.912
>ENST00000419300	ENSG00000204054(LINC00963)	hsa-miR-4459	0.912
>ENST00000624884	ENSG00000204054(LINC00963)	hsa-miR-6812-5p	0.912
>ENST00000419300	ENSG00000204054(LINC00963)	hsa-miR-4786-5p	0.912
>ENST00000419300	ENSG00000204054(LINC00963)	hsa-miR-5582-3p	0.911
>ENST00000419300	ENSG00000204054(LINC00963)	hsa-miR-3121-5p	0.91
>ENST00000423918	ENSG00000204054(LINC00963)	hsa-miR-6733-3p	0.909
>ENST00000624009	ENSG00000204054(LINC00963)	hsa-miR-4797-5p	0.908
>ENST00000623185	ENSG00000204054(LINC00963)	hsa-miR-4668-3p	0.908
>ENST00000419300	ENSG00000204054(LINC00963)	hsa-miR-548az-3p	0.907
>ENST00000419300	ENSG00000204054(LINC00963)	hsa-miR-4663	0.906
>ENST00000608272	ENSG00000204054(LINC00963)	hsa-miR-6803-3p	0.906
>ENST00000444184	ENSG00000204054(LINC00963)	hsa-miR-3913-3p	0.906
>ENST00000608669	ENSG00000204054(LINC00963)	hsa-miR-3116	0.906
>ENST00000419300	ENSG00000204054(LINC00963)	hsa-miR-4433a-3p	0.905
>ENST00000624884	ENSG00000204054(LINC00963)	hsa-miR-4423-3p	0.905
>ENST00000624009	ENSG00000204054(LINC00963)	hsa-miR-1304-3p	0.904
>ENST00000419300	ENSG00000204054(LINC00963)	hsa-miR-2682-5p	0.903
>ENST00000419300	ENSG00000204054(LINC00963)	hsa-miR-4505	0.902
>ENST00000454968	ENSG00000204054(LINC00963)	hsa-miR-6506-5p	0.901
>ENST00000624884	ENSG00000204054(LINC00963)	hsa-miR-499b-5p	0.899
>ENST00000454635	ENSG00000204054(LINC00963)	hsa-miR-2467-5p	0.899
>ENST00000624884	ENSG00000204054(LINC00963)	hsa-miR-186-5p	0.899
>ENST00000444184	ENSG00000204054(LINC00963)	hsa-miR-6752-3p	0.898
>ENST00000419300	ENSG00000204054(LINC00963)	hsa-miR-766-3p	0.898
>ENST00000419300	ENSG00000204054(LINC00963)	hsa-miR-4695-5p	0.898
>ENST00000419300	ENSG00000204054(LINC00963)	hsa-miR-17-3p	0.898
>ENST00000453213	ENSG00000204054(LINC00963)	hsa-miR-6719-3p	0.896
>ENST00000419300	ENSG00000204054(LINC00963)	hsa-miR-6893-5p	0.896
>ENST00000419300	ENSG00000204054(LINC00963)	hsa-miR-6832-5p	0.894
>ENST00000419300	ENSG00000204054(LINC00963)	hsa-miR-3928-3p	0.894
>ENST00000419300	ENSG00000204054(LINC00963)	hsa-miR-3173-3p	0.894
>ENST00000419300	ENSG00000204054(LINC00963)	hsa-miR-1299	0.894
>ENST00000419300	ENSG00000204054(LINC00963)	hsa-miR-5699-3p	0.892
>ENST00000624884	ENSG00000204054(LINC00963)	hsa-miR-3978	0.892
>ENST00000454968	ENSG00000204054(LINC00963)	hsa-miR-637	0.891
>ENST00000419300	ENSG00000204054(LINC00963)	hsa-miR-4768-5p	0.891
>ENST00000624884	ENSG00000204054(LINC00963)	hsa-miR-4745-5p	0.891
>ENST00000419300	ENSG00000204054(LINC00963)	hsa-miR-4318	0.889
>ENST00000419300	ENSG00000204054(LINC00963)	hsa-miR-632	0.888
>ENST00000458346	ENSG00000204054(LINC00963)	hsa-miR-2276-3p	0.888
>ENST00000412141	ENSG00000204054(LINC00963)	hsa-miR-205-5p	0.887
>ENST00000419300	ENSG00000204054(LINC00963)	hsa-miR-661	0.886
>ENST00000624884	ENSG00000204054(LINC00963)	hsa-miR-1225-3p	0.884
>ENST00000419300	ENSG00000204054(LINC00963)	hsa-miR-34c-5p	0.883
>ENST00000419300	ENSG00000204054(LINC00963)	hsa-miR-4685-5p	0.882
>ENST00000419300	ENSG00000204054(LINC00963)	hsa-miR-665	0.881
>ENST00000608272	ENSG00000204054(LINC00963)	hsa-miR-1281	0.881
>ENST00000622680	ENSG00000204054(LINC00963)	hsa-miR-6728-5p	0.879
>ENST00000423918	ENSG00000204054(LINC00963)	hsa-miR-4418	0.878
>ENST00000419300	ENSG00000204054(LINC00963)	hsa-miR-449b-5p	0.878
>ENST00000419300	ENSG00000204054(LINC00963)	hsa-miR-873-5p	0.876
>ENST00000419300	ENSG00000204054(LINC00963)	hsa-miR-6833-3p	0.874
>ENST00000419300	ENSG00000204054(LINC00963)	hsa-miR-532-5p	0.874
>ENST00000624884	ENSG00000204054(LINC00963)	hsa-miR-4664-5p	0.874
>ENST00000419300	ENSG00000204054(LINC00963)	hsa-miR-4452	0.874
>ENST00000419300	ENSG00000204054(LINC00963)	hsa-miR-4267	0.874
>ENST00000419300	ENSG00000204054(LINC00963)	hsa-miR-1252-3p	0.874
>ENST00000419300	ENSG00000204054(LINC00963)	hsa-miR-378a-5p	0.873
>ENST00000608272	ENSG00000204054(LINC00963)	hsa-miR-340-3p	0.872
>ENST00000419300	ENSG00000204054(LINC00963)	hsa-miR-129-5p	0.872
>ENST00000419300	ENSG00000204054(LINC00963)	hsa-miR-4763-3p	0.868
>ENST00000419300	ENSG00000204054(LINC00963)	hsa-miR-6895-3p	0.867
>ENST00000419300	ENSG00000204054(LINC00963)	hsa-miR-10a-5p	0.867
>ENST00000624884	ENSG00000204054(LINC00963)	hsa-miR-527	0.866
>ENST00000624884	ENSG00000204054(LINC00963)	hsa-miR-518a-5p	0.866
>ENST00000419300	ENSG00000204054(LINC00963)	hsa-miR-4698	0.865
>ENST00000419300	ENSG00000204054(LINC00963)	hsa-miR-3187-5p	0.864
>ENST00000624884	ENSG00000204054(LINC00963)	hsa-miR-139-5p	0.863
>ENST00000608272	ENSG00000204054(LINC00963)	hsa-miR-548aj-3p	0.861
>ENST00000419300	ENSG00000204054(LINC00963)	hsa-miR-4293	0.861
>ENST00000608669	ENSG00000204054(LINC00963)	hsa-miR-6780a-5p	0.86
>ENST00000419300	ENSG00000204054(LINC00963)	hsa-miR-1976	0.859
>ENST00000419300	ENSG00000204054(LINC00963)	hsa-miR-6849-3p	0.858
>ENST00000624009	ENSG00000204054(LINC00963)	hsa-miR-181b-3p	0.858
>ENST00000419300	ENSG00000204054(LINC00963)	hsa-miR-3689c	0.857
>ENST00000419300	ENSG00000204054(LINC00963)	hsa-miR-3689b-3p	0.857
>ENST00000419300	ENSG00000204054(LINC00963)	hsa-miR-1207-5p	0.857
>ENST00000624009	ENSG00000204054(LINC00963)	hsa-miR-4654	0.856
>ENST00000454968	ENSG00000204054(LINC00963)	hsa-miR-6775-3p	0.856
>ENST00000608272	ENSG00000204054(LINC00963)	hsa-miR-548x-3p	0.856
>ENST00000419300	ENSG00000204054(LINC00963)	hsa-miR-5189-5p	0.855
>ENST00000419300	ENSG00000204054(LINC00963)	hsa-miR-5095	0.855
>ENST00000622680	ENSG00000204054(LINC00963)	hsa-miR-5004-5p	0.855
>ENST00000419300	ENSG00000204054(LINC00963)	hsa-miR-3910	0.855
>ENST00000419300	ENSG00000204054(LINC00963)	hsa-miR-3689a-3p	0.855
>ENST00000419300	ENSG00000204054(LINC00963)	hsa-miR-3612	0.855
>ENST00000419300	ENSG00000204054(LINC00963)	hsa-miR-4486	0.854
>ENST00000419300	ENSG00000204054(LINC00963)	hsa-miR-6830-3p	0.854
>ENST00000608272	ENSG00000204054(LINC00963)	hsa-miR-6776-5p	0.854
>ENST00000608369	ENSG00000204054(LINC00963)	hsa-miR-330-5p	0.854
>ENST00000419300	ENSG00000204054(LINC00963)	hsa-miR-1202	0.852
>ENST00000419300	ENSG00000204054(LINC00963)	hsa-miR-34b-5p	0.851
>ENST00000419300	ENSG00000204054(LINC00963)	hsa-miR-30b-3p	0.851
>ENST00000419300	ENSG00000204054(LINC00963)	hsa-miR-6877-3p	0.85
>ENST00000419300	ENSG00000204054(LINC00963)	hsa-miR-4684-5p	0.85
>ENST00000624884	ENSG00000204054(LINC00963)	hsa-miR-1233-5p	0.85
>ENST00000419300	ENSG00000204054(LINC00963)	hsa-miR-4674	0.849
>ENST00000419300	ENSG00000204054(LINC00963)	hsa-miR-6720-5p	0.847
>ENST00000454968	ENSG00000204054(LINC00963)	hsa-miR-541-3p	0.847
>ENST00000419300	ENSG00000204054(LINC00963)	hsa-miR-4659b-5p	0.847
>ENST00000608272	ENSG00000204054(LINC00963)	hsa-miR-6827-3p	0.847
>ENST00000419300	ENSG00000204054(LINC00963)	hsa-miR-3664-3p	0.847
>ENST00000419300	ENSG00000204054(LINC00963)	hsa-miR-1827	0.846
>ENST00000624884	ENSG00000204054(LINC00963)	hsa-miR-1296-3p	0.844
>ENST00000419300	ENSG00000204054(LINC00963)	hsa-miR-6512-3p	0.841
>ENST00000419300	ENSG00000204054(LINC00963)	hsa-miR-4677-3p	0.841
>ENST00000419300	ENSG00000204054(LINC00963)	hsa-miR-1270	0.841
>ENST00000419300	ENSG00000204054(LINC00963)	hsa-miR-18a-3p	0.839
>ENST00000624884	ENSG00000204054(LINC00963)	hsa-miR-93-3p	0.838
>ENST00000419300	ENSG00000204054(LINC00963)	hsa-miR-3065-5p	0.838
>ENST00000419300	ENSG00000204054(LINC00963)	hsa-miR-3653-5p	0.837
>ENST00000419300	ENSG00000204054(LINC00963)	hsa-miR-766-5p	0.836
>ENST00000419300	ENSG00000204054(LINC00963)	hsa-miR-449c-5p	0.836
>ENST00000453213	ENSG00000204054(LINC00963)	hsa-miR-3191-5p	0.836
>ENST00000624009	ENSG00000204054(LINC00963)	hsa-miR-6826-3p	0.834
>ENST00000419300	ENSG00000204054(LINC00963)	hsa-miR-4433b-3p	0.834
>ENST00000419300	ENSG00000204054(LINC00963)	hsa-miR-6796-5p	0.832
>ENST00000608272	ENSG00000204054(LINC00963)	hsa-miR-3183	0.831
>ENST00000624884	ENSG00000204054(LINC00963)	hsa-miR-6778-5p	0.83
>ENST00000419300	ENSG00000204054(LINC00963)	hsa-miR-454-5p	0.83
>ENST00000423918	ENSG00000204054(LINC00963)	hsa-miR-6807-5p	0.829
>ENST00000608669	ENSG00000204054(LINC00963)	hsa-miR-5690	0.827
>ENST00000419300	ENSG00000204054(LINC00963)	hsa-miR-7110-5p	0.827
>ENST00000608669	ENSG00000204054(LINC00963)	hsa-miR-1207-3p	0.827
>ENST00000608272	ENSG00000204054(LINC00963)	hsa-miR-4537	0.826
>ENST00000624884	ENSG00000204054(LINC00963)	hsa-miR-6505-3p	0.826
>ENST00000419300	ENSG00000204054(LINC00963)	hsa-miR-548an	0.826
>ENST00000419300	ENSG00000204054(LINC00963)	hsa-miR-650	0.825
>ENST00000419300	ENSG00000204054(LINC00963)	hsa-miR-605-3p	0.825
>ENST00000419300	ENSG00000204054(LINC00963)	hsa-miR-4472	0.825
>ENST00000419300	ENSG00000204054(LINC00963)	hsa-miR-6779-5p	0.824
>ENST00000419300	ENSG00000204054(LINC00963)	hsa-miR-4649-3p	0.824
>ENST00000419300	ENSG00000204054(LINC00963)	hsa-miR-759	0.823
>ENST00000419300	ENSG00000204054(LINC00963)	hsa-miR-6887-5p	0.823
>ENST00000419300	ENSG00000204054(LINC00963)	hsa-miR-580-3p	0.823
>ENST00000622680	ENSG00000204054(LINC00963)	hsa-miR-4430	0.822
>ENST00000419300	ENSG00000204054(LINC00963)	hsa-miR-3975	0.822
>ENST00000419300	ENSG00000204054(LINC00963)	hsa-miR-6811-3p	0.82
>ENST00000622680	ENSG00000204054(LINC00963)	hsa-miR-5003-5p	0.82
>ENST00000624009	ENSG00000204054(LINC00963)	hsa-miR-658	0.818
>ENST00000453213	ENSG00000204054(LINC00963)	hsa-miR-597-3p	0.818
>ENST00000419300	ENSG00000204054(LINC00963)	hsa-miR-411-5p	0.818
>ENST00000412141	ENSG00000204054(LINC00963)	hsa-miR-545-3p	0.817
>ENST00000419300	ENSG00000204054(LINC00963)	hsa-miR-6798-5p	0.817
>ENST00000419300	ENSG00000204054(LINC00963)	hsa-miR-876-3p	0.816
>ENST00000419300	ENSG00000204054(LINC00963)	hsa-miR-7156-5p	0.816
>ENST00000419300	ENSG00000204054(LINC00963)	hsa-miR-6801-5p	0.816
>ENST00000608272	ENSG00000204054(LINC00963)	hsa-miR-6736-3p	0.816
>ENST00000608669	ENSG00000204054(LINC00963)	hsa-miR-4297	0.816
>ENST00000419300	ENSG00000204054(LINC00963)	hsa-miR-575	0.815
>ENST00000444184	ENSG00000204054(LINC00963)	hsa-miR-3918	0.815
>ENST00000419300	ENSG00000204054(LINC00963)	hsa-miR-6805-3p	0.815
>ENST00000453213	ENSG00000204054(LINC00963)	hsa-miR-518c-5p	0.815
>ENST00000419300	ENSG00000204054(LINC00963)	hsa-miR-504-5p	0.813
>ENST00000419300	ENSG00000204054(LINC00963)	hsa-miR-6864-3p	0.813
>ENST00000419300	ENSG00000204054(LINC00963)	hsa-miR-5691	0.813
>ENST00000444184	ENSG00000204054(LINC00963)	hsa-miR-128-2-5p	0.813
>ENST00000607931	ENSG00000204054(LINC00963)	hsa-miR-6839-3p	0.812
>ENST00000419300	ENSG00000204054(LINC00963)	hsa-miR-6838-3p	0.812
>ENST00000419300	ENSG00000204054(LINC00963)	hsa-miR-30c-1-3p	0.812
>ENST00000419300	ENSG00000204054(LINC00963)	hsa-miR-6810-3p	0.811
>ENST00000454635	ENSG00000204054(LINC00963)	hsa-miR-520a-5p	0.811
>ENST00000419300	ENSG00000204054(LINC00963)	hsa-miR-4518	0.811
>ENST00000622680	ENSG00000204054(LINC00963)	hsa-miR-4503	0.811
>ENST00000419300	ENSG00000204054(LINC00963)	hsa-miR-3679-3p	0.811
>ENST00000444184	ENSG00000204054(LINC00963)	hsa-miR-1266-5p	0.81
>ENST00000419300	ENSG00000204054(LINC00963)	hsa-miR-4447	0.81
>ENST00000419300	ENSG00000204054(LINC00963)	hsa-miR-1915-3p	0.81
>ENST00000419300	ENSG00000204054(LINC00963)	hsa-miR-6825-5p	0.809
>ENST00000419300	ENSG00000204054(LINC00963)	hsa-miR-10b-5p	0.809
>ENST00000412141	ENSG00000204054(LINC00963)	hsa-miR-6756-5p	0.808
>ENST00000607931	ENSG00000204054(LINC00963)	hsa-miR-619-5p	0.808
>ENST00000419300	ENSG00000204054(LINC00963)	hsa-miR-873-3p	0.808
>ENST00000419300	ENSG00000204054(LINC00963)	hsa-miR-6836-3p	0.808
>ENST00000608272	ENSG00000204054(LINC00963)	hsa-miR-6769b-3p	0.808
>ENST00000454635	ENSG00000204054(LINC00963)	hsa-miR-525-5p	0.808
>ENST00000608272	ENSG00000204054(LINC00963)	hsa-miR-548j-3p	0.807
>ENST00000608272	ENSG00000204054(LINC00963)	hsa-miR-548aq-3p	0.807
>ENST00000608272	ENSG00000204054(LINC00963)	hsa-miR-548ae-3p	0.807
>ENST00000419300	ENSG00000204054(LINC00963)	hsa-miR-6835-3p	0.807
>ENST00000624884	ENSG00000204054(LINC00963)	hsa-miR-583	0.806
>ENST00000608272	ENSG00000204054(LINC00963)	hsa-miR-548am-3p	0.805
>ENST00000608272	ENSG00000204054(LINC00963)	hsa-miR-548ah-3p	0.805
>ENST00000624884	ENSG00000204054(LINC00963)	hsa-miR-4651	0.804
>ENST00000419300	ENSG00000204054(LINC00963)	hsa-miR-6752-5p	0.803
>ENST00000419300	ENSG00000204054(LINC00963)	hsa-miR-548d-3p	0.803
>ENST00000453213	ENSG00000204054(LINC00963)	hsa-miR-1260b	0.803
>ENST00000608669	ENSG00000204054(LINC00963)	hsa-miR-5588-3p	0.802
>ENST00000419300	ENSG00000204054(LINC00963)	hsa-miR-4758-3p	0.802
>ENST00000419300	ENSG00000204054(LINC00963)	hsa-miR-378g	0.802
>ENST00000444184	ENSG00000204054(LINC00963)	hsa-miR-1245b-3p	0.8
>ENST00000419300	ENSG00000204054(LINC00963)	hsa-miR-1227-3p	0.8
